1 **Mercury-methylating bacteria are associated with zooplankton: a proof-of-principle**  
2 **survey in the Baltic Sea**

3

4 Elena Gorokhova, Anne L. Soerensen and Nisha H. Motwani

5 Department of Environmental Science and Analytical Chemistry, Stockholm University, SE-  
6 10691 Stockholm, Sweden

7

8 **Abstract**

9 Methylmercury (MeHg) is a potent neurotoxin that biomagnifies in marine food-webs.  
10 Inorganic mercury (Hg) methylation is generally considered to be conducted by bacteria  
11 associated with sediment or detritus, but endogenous methylation by the gut microbiome of  
12 animals in the lower food webs is another possible source. We examined the occurrence of the  
13 bacterial gene (*hgcA*), required for Hg methylation, in the guts of dominant Baltic  
14 zooplankters. A qPCR assay targeting the *hgcA* sequence in three main clades  
15 (*Deltaproteobacteria*, *Firmicutes* and *Archaea*) was used in the field-collected specimens of  
16 copepods (*Acartia bifilosa*, *Eurytemora affinis*, *Pseudocalanus acuspes* and *Limnocalanus*  
17 *macrurus*) and cladocerans (*Bosmina coregoni maritima* and *Cercopagis pengoi*). All  
18 copepods were found to carry *hgcA* genes in their gut microbiome, whereas no positive  
19 amplification was recorded in the cladocerans. In the copepods, *hgcA* genes belonging to only  
20 *Deltaproteobacteria* and *Firmicutes* were detected. These findings suggest that endogenous  
21 Hg methylation can occur in zooplankton and may contribute to seasonal, spatial and vertical  
22 MeHg variability in water column and food webs. Additional molecular and metagenomics  
23 studies are needed to identify bacteria carrying *hgcA* genes and improve their quantification in  
24 microbiota.

## 25 INTRODUCTION

26 Mercury (Hg) is a global pollutant adversely affecting human and wildlife health due to its  
27 toxicity and distribution in the environment.<sup>1</sup> Various processes, both natural and  
28 anthropogenic, lead to the release of primarily inorganic Hg (IHg), which can undergo  
29 methylation resulting in formation of neurotoxic monomethylmercury (MeHg). While both IHg  
30 and MeHg can be taken up by biota, only MeHg bioaccumulates in aquatic food webs.<sup>1,2</sup>

31 The primary pathway for MeHg production is microbial Hg methylation,<sup>3</sup> and a bacterial gene  
32 cluster associated with such methylation (*hgcAB*) has recently been discovered.<sup>4,5</sup> It was  
33 previously thought that mainly sulfate-(SRB) and iron-(FeRB) reducing bacteria methylate Hg  
34 in anoxic conditions.<sup>6-8</sup> However, the *hgcAB* gene cluster has been identified in a variety of  
35 methanogens and syntrophic, acetogenic, and fermentative *Firmicutes* indicating a broader  
36 phylogenetic representation of Hg methylators.<sup>9</sup> Recently, clade-specific quantitative PCR  
37 (qPCR) assays were developed to quantify the abundance of *hgcA* gene of the main  
38 methylators.<sup>10</sup> Hence, *hgcAB* and *hgcA* distribution can be used to predict occurrence of  
39 potential Hg methylators in the environment<sup>11</sup>; moreover, the association between abundance  
40 of *hgcA* and the rate of mercury methylation were found to be strong and present in different  
41 environments.<sup>10</sup> Thus, understanding *hgcAB* and *hgcA* distribution is essential for estimating  
42 MeHg production in the water column and biomagnification in food webs.<sup>12</sup>

43 Worldwide, great differences in MeHg accumulation have been reported for similarly structured  
44 and geographically close food webs.<sup>2,12</sup> In aquatic environments, MeHg production takes place  
45 in both sediment and water column;<sup>12,13</sup> however, in the oxygenated waters, Hg methylation  
46 may occur in anoxic microenvironments on sinking organic matter.<sup>8</sup> In pelagia, MeHg,  
47 bioconcentrated from the water column by phytoplankton, enters the food web via zooplankton  
48 grazing, with subsequent transfer of zooplankton-associated MeHg to zooplanktivores.<sup>12,14</sup> An  
49 additional source of MeHg and a possible contributor to the variability in food-web  
50 bioaccumulation could be endogenous Hg methylation by gastrointestinal microbiota<sup>4,15</sup> with  
51 subsequent MeHg uptake by the host. Therefore, endogenous Hg methylation in primary  
52 consumers could constitute an unexplored MeHg source with consequences for higher trophic  
53 levels. Exploring the Hg methylation capacity of gut microbiota has been attempted in various  
54 animals using both analytical and molecular approaches.<sup>15</sup> While the gene cluster *hgcAB* has  
55 been identified in the gut microbiome of some terrestrial arthropods,<sup>4,15</sup> its status in aquatic  
56 invertebrates is so far unknown.

57 In the Baltic Sea, Hg sources are historically high, due to both natural and anthropogenic  
58 inputs,<sup>16</sup> which should promote Hg methylation ability in microorganisms<sup>3</sup> and facilitate  
59 establishment of methylators in microbiota of filter-feeders, such as zooplankton. Here, we  
60 report that the *hgcA* gene is present in the microbiome of Baltic copepods; this observation  
61 represents the first record of potential methylators associated with zooplankton. Our findings  
62 imply that endogenous Hg methylation can occur in primary consumers as a pathway by which  
63 MeHg can enter the food webs.

64

## 65 **EXPERIMENTAL**

### 66 **Field zooplankton collections and sample preparation**

67 Zooplankton were collected at four coastal and open sea stations of the northern Baltic Proper  
68 and the Bothnian Sea (Table 1, Figure S1). We focused on microcrustaceans, cladocerans and  
69 copepods, which are the major groups of mesozooplankton in the Baltic Sea. These  
70 microscopic animals are largely herbivorous, with parthenogenic cladocerans thriving in the  
71 mixing layer and reproducing mostly during summer, whereas copepods usually reside at  
72 deeper layers performing vertical migrations related to ontogeny, temperature and predation  
73 risk.<sup>17</sup>

74 Animals retrieved from the cod-end were placed in 0.2- $\mu$ m filtered aerated seawater and  
75 supplied with an excess of the cryptophyte *Rhodomonas salina* (strain CCAP 978/24) to clear  
76 the guts of any potential hgCA-containing microorganisms associated with their food items  
77 and only retain those microbes closely associated with the gut mucosa. This procedure was  
78 applied to all species except *Cercopagis pengoi*, a predatory onychopod, feeding by  
79 puncturing exoskeleton of planktonic crustaceans and sucking soft body tissues.<sup>18</sup> Such  
80 feeding mode leaves the chitinous gut of the prey intact in the discarded carcass, hence, the  
81 contamination of the predator gut with prey microflora was considered unlikely, and *C.*  
82 *pengoi* were not subjected to the gut clearance procedure. For the rest of the zooplankton,  
83 randomly selected individuals with visibly reddish guts (indicating that the animals were  
84 active and feeding during the incubation) were selected following two-hour incubation. All  
85 specimens were preserved in groups using RNAlater and stored at  $-20^{\circ}\text{C}$ .<sup>19</sup>

86 From the RNAlater-preserved samples, different species of copepods and cladocerans were  
87 picked under a dissecting microscope with forceps, rinsed in artificial seawater, and

88 transferred in groups (30-50 ind. sample<sup>-1</sup>) into Eppendorf tubes. The following species and  
89 developmental stages were selected for the analysis: (1) copepodites (CV–VI) of *Acartia*  
90 *bifilosa* and *Eurytemora affinis*; these are small calanoids, dominant in the study area and  
91 present all year round, mostly in the epipelagia; (2) copepodites (CIII-IV) of *Limnocalanus*  
92 *macrurus* and *Pseudocalanus acuspes*; these are large calanoids, dominant zooplankton  
93 below the halocline in the Northern Baltic, and important prey for zooplanktivores; (3)  
94 cladoceran *Bosmina coregoni maritima* (females, >0.7 mm); a small zooplankter, often  
95 reaching high abundance in the surface waters during summer and being occasionally  
96 important prey for zooplanktivorous fish, and (4) cladoceran *Cercopagis pengoi* (Barb Stages  
97 II and III); a large predatory zooplankter representing a secondary consumers a common prey  
98 for fish during summer. Thus, except for *C. pengoi*, all analyzed species are primary  
99 consumers and dominant species in the pelagic food web.

100 Reference samples used as a contamination control were hatched *Artemia* spp. nauplii (San  
101 Francisco Bay Brand) grown on axenic culture of *R. salina* ( $5 \times 10^4$  cells mL<sup>-1</sup>) in artificial  
102 seawater (28 g L<sup>-1</sup> of Instant Ocean synthetic sea salt; Aquarium Systems Inc., Sarrebourg,  
103 France). The animals were sacrificed after reaching a body length of ~2 mm and treated in the  
104 same way as the zooplankton samples. As no positive amplification was ever produced in the  
105 reference samples with *Artemia* guts (3 replicates, 25 guts sample<sup>-1</sup>), we consider bacterial  
106 contamination during sample preparation to be either negligible or non-existent.

107

## 108 **DNA extraction**

109 From each specimen, the gut was excised with a sharp needle, a pair of ultrafine forceps and a  
110 dissecting microscope; the instrumentation and glassware were sterile. In total, 36 samples,  
111 25-50 guts sample<sup>-1</sup>, were prepared (Table 1). The guts were transferred into 1.5 mL  
112 centrifuge tubes for Chelex-based DNA extraction<sup>20</sup> following a protocol developed for  
113 analysis of prokaryotes in zooplankton.<sup>21</sup> See Supporting Information for details and Table S1  
114 for DNA yield in different species.

115

## 116 **qPCR assay**

117 Three main clades were considered as potential *hgcA*-targets, *Deltaproteobacteria*,  
118 *Firmicutes*, and *Archaea*. For each clade, a separate qPCR assay was performed using a clade-  
119 specific protocol of Christensen and co-workers.<sup>10</sup> As a standard, a synthetic DNA

120 oligonucleotide<sup>22</sup> comprising the clade-specific target sequence was constructed using a  
121 representative strain: *Dv. desulfuricans*, *Df. metallireducens*, and *Ml. hollandica*, for  
122 *Deltaproteobacteria*, *Firmicutes*, and *Archaea*, respectively (Tables S2-S3). The standards  
123 were cloned into plasmids and applied in five-step tenfold serial dilutions,  $1.5 \times 10^6$  to  $1.5 \times 10^2$   
124 apparent copies of target DNA per reaction (Table S4, Figure S2). The qPCR primers and  
125 amplification conditions<sup>10</sup> (Tables S3 and S4) were used for all test samples, reference  
126 samples, NTC and standards. Under these conditions, qPCR yielded a single product in each  
127 standard and in the test samples within an assay (Figure S3). No product was produced in the  
128 reference samples and NTC (non-template control) within the assay range (30 cycles).

129

### 130 **Data analysis**

131 The number of *hgcA* copies detected by qPCR was used to calculate the number of *hgcA* copies  
132 per individual and per  $\mu\text{g}$  of zooplankter wet weight (i.e., weight-specific number of Hg  
133 methylators); individual zooplankter weights<sup>23</sup> were used for these calculations. Due to  
134 substantial variations in the amplification efficiency and detection limits for these qPCR assays  
135 among different bacterial strains (efficiency: 60 to 90%, detection limits:  $10^2$  to  $10^6$  *hgcA*  
136 copies)<sup>10</sup>, any statistical comparisons between species/sites were not meaningful<sup>24</sup>. Therefore,  
137 we consider our results largely descriptive, indicative of the presence/absence of *hgcA* and, to  
138 a lesser extent, of the interspecific or geographical variation.

139

## 140 **RESULTS AND DISCUSSION**

141 All four copepod species were tested positive for *hgcA* genes (Figure 1), whereas no positive  
142 amplification was observed for the two cladocerans. Among the clades tested, the *hgcA* genes  
143 of only *Deltaproteobacteria* and *Firmicutes*, but not *Archaea*, were found in the copepod guts.  
144 Although there was a substantial imbalance in the sampling effort between copepods and  
145 cladocerans (25 vs. 8 samples; Table 1), the occurrence of *hgcA*-positive samples for copepods  
146 only is suggestive of a difference. However, the between-clade differences given the variability  
147 in the limit of quantification between *Archaea* and the other two clades, and, to a lesser extent,  
148 between *Deltaproteobacteria* and *Firmicutes* (Table S4) should be treated as indicative.  
149 Moreover, although *Archaea* are commonly reported to occur in zooplankton guts,<sup>25</sup> the  
150 contribution of this group can be low compared to bacteria.<sup>26</sup> This may have contributed to the  
151 lack of *hgcA*-positive amplification. Also, considering the variability in the amplification

152 efficiency among bacteria<sup>10</sup> and unknown composition of the *hgcA*-positive microbiota, only  
153 rough interpopulation comparisons are possible. However, the overall findings suggest that  
154 microbiota of zooplankters carries *hgcA* genes and thus may be capable of Hg methylation.

155 Whether bacteria-driven Hg methylation in zooplankton guts takes place depends not only on  
156 the occurrence of *hgcA*-carrying bacteria but also on the functional performance of these  
157 bacteria. To assess the *hgcA* expression, an analytical effort is required using available  
158 molecular tools, such as RT-qPCR, RNA sequencing, and RNA-SIP. Furthermore, a better  
159 understanding of community structure is needed. Although our results do not provide any  
160 taxonomic identification of the bacteria involved, the observed prevalence of *Firmicutes* among  
161 the *hgcA*-carriers (Figure 1) agrees well with a relatively high abundance of this bacterial group  
162 in the microbiome of other copepods.<sup>27–29</sup> In future studies, a 16S rRNA gene diversity profiling  
163 and *hgcAB* amplification with high-throughput sequencing should be combined with *hgcA*  
164 quantification.<sup>11</sup> Broad-scale zooplankton sampling, including seasonal, spatial and vertical  
165 coverage, should provide material for such an evaluation.

166 If gut Hg methylation occurs, zooplankton may serve as a primary MeHg entrance point of  
167 global significance and affect variability in MeHg transfer to secondary consumers.<sup>3</sup> A mass-  
168 balance budget for the herbivorous marine copepod *Calanus hyperboreus* suggested that  
169 endogenous Hg methylation could account for up to 70% of the annual MeHg uptake in this  
170 copepod.<sup>30</sup> If these estimates are correct, they might explain why reported drivers of MeHg  
171 variability are often contradictory. Indeed, MeHg concentrations in herbivorous zooplankton  
172 vary among taxa,<sup>31,32</sup> demographic population structure<sup>33</sup> and growth stoichiometry.<sup>34</sup> In wild  
173 populations, however, these factors are difficult to disentangle,<sup>35</sup> partly due to their ultimate  
174 dependence on body size. Todorova et al.<sup>35</sup> speculated that higher bioaccumulation of MeHg in  
175 larger species resulted from higher filtration efficiency being a function of body size, whereas  
176 Kainz et al.<sup>32</sup> attributed this size dependence to large zooplankton having larger anaerobic  
177 intestinal niches, where Hg methylation can take place.<sup>36</sup> We found that larger copepods (but  
178 not equally large *Cercopagis*) carried a greater number of *hgcA* copies, and not only in terms  
179 of the individual- (thus supporting the view of Kainz et al.<sup>32</sup>) but also weight-specific values;  
180 the latter implies phylogenetic differences. In the large-bodied *L. macrurus* and *P. acuspes*, our  
181 estimate of *hgcA* genes yielded up to 10-fold higher values compared to the small-bodied *A.*  
182 *bifilosa* and *E. affinis*, with the difference being most pronounced for *Firmicutes* (Figure 1).  
183 The group-specific variability may affect spatial and seasonal contribution of endogenous  
184 MeHg to secondary consumers, because different zooplankton groups that vary in their ability



185 to methylate Hg would have different capacity to contribute MeHg to bulk zooplankton. For  
186 example, the relative importance of gut Hg methylation and MeHg uptake by zooplankton  
187 would increase in winter due to the higher contribution of copepods to bulk zooplankton  
188 biomass.<sup>37</sup>

189 The gut of copepods is likely to have anoxic conditions (at least in some species)<sup>36</sup> and thus a  
190 suitable habitat for methylating microbes. Notably, the morphology of cladoceran gut  
191 predisposes it to active oxygenation, and gut microbiota in these animals is dominated by clones  
192 affiliated to aerobic or facultative anaerobic bacteria,<sup>38</sup> which may explain the lack of the  
193 positive *hgcA* amplification in our cladoceran samples. Hg methylating genes have been  
194 detected in invertebrate microbiota, including termites, beetles, and oligochaetes,<sup>4,15</sup> and in  
195 some invertebrates the endogenous MeHg production has been documented.<sup>39</sup> As a life form,  
196 intestinal microbiota exists in biofilms, and such communities are increasingly recognized as  
197 important sites for environmental Hg methylation.<sup>40,41</sup> Commensal biofilms are present in both  
198 planktonic and benthic animals that actively exchange gut and body-surface microbiota with  
199 the ambient microbial communities and other animals.<sup>42</sup> We found no *hgcA* genes in the gut of  
200 the predatory *Cercopagis pengoi*, which may indicate that the digestive system of predators  
201 with this feeding mode (puncturing exoskeleton of planktonic crustaceans and sucking soft  
202 body tissues) is less likely to become populated by methylating bacteria compared to filter-  
203 feeders that have a more active exchange with diverse microbial communities of seston.

204 The presence of Hg methylating bacteria in copepod guts and, hence, in their carcasses and  
205 fecal pellets, could be an important and yet unquantified source for MeHg production in the  
206 water column.<sup>43</sup> Remineralization of organic matter is associated with elevated MeHg  
207 production,<sup>43,44</sup> and Hg methylation potential is higher in fresh organic matter than in  
208 decomposed material.<sup>8,44</sup> Zooplankton fecal pellets, a considerable fraction of marine organic  
209 matter, are almost completely remineralized in the water column, while degraded  
210 phytoplankton and terrestrial organic matter aggregates are more likely to reach the sea floor.<sup>45</sup>  
211 The presence of active Hg methylating bacteria in fecal pellets could increase Hg methylation  
212 efficiency compared to non-fecal organic matter, where a lag phase related to colonization time  
213 is expected. In the latter case, the ecological niche for Hg methylating bacteria might not  
214 become available until the most labile parts are already remineralized, resulting in lower MeHg  
215 production. Ingestion of fecal pellets by mesopelagic zooplankters and benthic animals could  
216 also facilitate spread of methylators among invertebrates and enrich these consumers with  
217 microflora of epipelagic zooplankters. In addition, these pellets can become enriched in Hg

218 methylators during the time spent in the water column. In line with this, we found higher *hgcA*  
219 abundances in *P. acuspes* and *L. macrurus* residing in deeper water layers compared with *A.*  
220 *bifilosa* and *E. affinis* inhabiting the epipelagic zone (Figure 1).

221 Endogenous Hg methylation in zooplankton could help explain spatial and temporal trends of  
222 fish MeHg concentrations in the Baltic Sea. The strong decrease in Hg inputs to the Baltic Sea  
223 during the last decades has not resulted in a consistent decrease in fish Hg levels across the  
224 sea.<sup>16,46</sup> During this time, significant and basin-specific changes occurred in zooplankton  
225 communities<sup>47</sup> in concert with alterations in climate, nutrient inputs and terrestrial runoff.<sup>16,44</sup>  
226 It is plausible that synchronous shifts in the methylation capacity of zooplankton, at both the  
227 individual microbiome and community levels, have taken place contributing to the MeHg  
228 dynamics in the food web. Quantitative analysis of the interactions between biotic and abiotic  
229 processes governing endogenous MeHg production is therefore essential if we are to understand  
230 uptake and bioaccumulation of MeHg in water column and food webs.

231

232

### 233 **Conflicts of Interest**

234 There are no conflicts of interest to declare.

235

### 236 **References**

- 237 1 D. W. Boening, *Chemosphere*, 2000, **40**, 1335–1351.  
238 2 R. A. Lavoie, T. D. Jardine, M. M. Chumchal, K. A. Kidd and L. M. Campbell,  
239 *Environ. Sci. Technol.*, 2013, **47**, 13385–13394.  
240 3 H. Hsu-Kim, K. H. Kucharzyk, T. Zhang and M. A. Deshusses, *Environ. Sci. Technol.*,  
241 2013, **47**, 2441–2456.  
242 4 M. Podar, C. C. Gilmour, C. C. Brandt, A. Soren, S. D. Brown, B. R. Crable, A. V.  
243 Palumbo, A. C. Somenahally and D. A. Elias, *Sci. Adv.*, 2015, **1**, e1500675.  
244 5 J. M. Parks, A. Johs, M. Podar, R. Bridou, R. A. Hurt, S. D. Smith, S. J. Tomanicek, Y.  
245 Qian, S. D. Brown, C. C. Brandt, A. V. Palumbo, J. C. Smith, J. D. Wall, D. A. Elias and L.  
246 Liang, *Science*, 2013, **339**, 1332–1335.  
247 6 G. C. Compeau and R. Bartha, *Appl. Environ. Microbiol.*, 1985, **50**, 498–502.  
248 7 C. C. Gilmour, E. A. Henry and R. Mitchell, *Environ. Sci. Technol.*, 1992, **26**, 2281–  
249 2287.  
250 8 E. Gascón Díez, J.-L. Loizeau, C. Cosio, S. Bouchet, T. Adatte, D. Amouroux and A. G.  
251 Bravo, *Environ. Sci. Technol.*, 2016, **50**, 11672–11679.  
252 9 C. C. Gilmour, M. Podar, A. L. Bullock, A. M. Graham, S. D. Brown, A. C.  
253 Somenahally, A. Johs, R. A. Hurt, K. L. Bailey and D. A. Elias, *Environ. Sci. Technol.*, 2013,  
254 **47**, 11810–11820.



- 255 10 G. A. Christensen, A. M. Wymore, A. J. King, M. Podar, R. A. Hurt, E. U. Santillan, A.  
256 Soren, C. C. Brandt, S. D. Brown, A. V. Palumbo, J. D. Wall, C. C. Gilmour and D. A. Elias,  
257 *Appl. Environ. Microbiol.*, 2016, **82**, 6068–6078.
- 258 11 G. A. Christensen, A. C. Somenahally, J. G. Moberly, C. M. Miller, A. J. King, C. C.  
259 Gilmour, S. D. Brown, M. Podar, C. C. Brandt, S. C. Brooks, A. V. Palumbo, J. D. Wall and  
260 D. A. Elias, *Appl. Environ. Microbiol.*, 2017, AEM.01049-17.
- 261 12 A. R. Paranjape and B. D. Hall, *FACETS*, 2017, **2**, 85–119.
- 262 13 A. T. Schartup, P. H. Balcom, A. L. Soerensen, K. J. Gosnell, R. S. D. Calder, R. P.  
263 Mason and E. M. Sunderland, *Proc. Natl. Acad. Sci.*, 2015, **112**, 11789–11794.
- 264 14 T. Mathews and N. S. Fisher, *Environ. Toxicol. Chem.*, 2008, **27**, 1093–1101.
- 265 15 R. C. R. Martín-Doimeadios, R. Mateo and M. Jiménez-Moreno, *Environ. Res.*, 2017,  
266 **152**, 454–461.
- 267 16 A. L. Soerensen, A. T. Schartup, E. Gustafsson, B. G. Gustafsson, E. Undeman and E.  
268 Björn, *Environ. Sci. Technol.*, 2016, **50**, 11787–11796.
- 269 17 U. Sommer and H. Stibor, *Ecol. Res.*, 2002, **17**, 161–174.
- 270 18 I. K. Rivier, *The Predatory Cladocera (Onychopoda: Podonidae, Polyphemidae,*  
271 *Cercopagidae) and the Leptodorida of the World*, SPB Academic Publishing, 1998, vol. 13.
- 272 19 E. Gorokhova, *Limnol. Oceanogr. Methods*, 2005, **3**, 143–148.
- 273 20 G. Giraffa, L. Rossetti and E. Neviani, *J. Microbiol. Methods*, 2000, **42**, 175–184.
- 274 21 N. H. Motwani and E. Gorokhova, *PLoS ONE*, 2013, **8**, e79230.
- 275 22 J. Vermeulen, F. Pattyn, K. De Preter, L. Vercruysee, S. Derveaux, P. Mestdagh, S.  
276 Lefever, J. Hellemans, F. Speleman and J. Vandesompele, *Nucleic Acids Res.*, 2009, **37**, e138.
- 277 23 L. Hernroth, *Balt. Mar. Biol.*, 1985, **10**, 15.
- 278 24 Y. Karlen, A. McNair, S. Perseguers, C. Mazza and N. Mermod, *BMC Bioinformatics*,  
279 2007, **8**, 131.
- 280 25 B. Hansen and G. Bech, *J. Plankton Res.*, 1996, **18**, 257–273.
- 281 26 D. De Corte, A. Srivastava, M. Koski, J. A. L. Garcia, Y. Takaki, T. Yokokawa, T.  
282 Nunoura, N. H. Elisabeth, E. Sintes and G. J. Herndl, *Environ. Microbiol.*, ,  
283 DOI:10.1111/1462-2920.13944.
- 284 27 K. M. Shoemaker and P. H. Moisander, *Environ. Microbiol.*, 2017, **19**, 3087–3097.
- 285 28 K. M. Shoemaker and P. H. Moisander, *FEMS Microbiol. Ecol.*, 2015, **91**, fiv064.
- 286 29 D. De Corte, I. Lekunberri, E. Sintes, J. A. L. Garcia, S. Gonzales and G. J. Herndl,  
287 *Aquat. Microb. Ecol.*, 2014, **72**, 215–225.
- 288 30 M. Pućko, A. Burt, W. Walkusz, F. Wang, R. W. Macdonald, S. Rysgaard, D. G.  
289 Barber, J.-É. Tremblay and G. A. Stern, *Environ. Sci. Technol.*, 2014, **48**, 7280–7288.
- 290 31 P. C. Pickhardt, C. L. Folt, C. Y. Chen, B. Klaue and J. D. Blum, *Sci. Total Environ.*,  
291 2005, **339**, 89–101.
- 292 32 M. Kainz, M. Lucotte and C. C. Parrish, *Can. J. Fish. Aquat. Sci.*, 2002, **59**, 1606–1615.
- 293 33 J. Chételat, M. Amyot and L. Cloutier, *Freshw. Biol.*, 2012, **57**, 1228–1240.
- 294 34 R. Karimi, C. Y. Chen, P. C. Pickhardt, N. S. Fisher and C. L. Folt, *Proc. Natl. Acad.*  
295 *Sci.*, 2007, **104**, 7477–7482.
- 296 35 S. Todorova, C. T. Driscoll, D. A. Matthews and S. W. Effler, *Environ. Sci. Technol.*,  
297 2015, **49**, 4066–4071.
- 298 36 K. W. Tang, R. N. Glud, A. Glud, S. Rysgaard and T. G. Nielsen, *Limnol. Oceanogr.*,  
299 2011, **56**, 666–672.
- 300 37 M. Johansson, E. Gorokhova and U. Larsson, *J. Plankton Res.*, 2004, **26**, 67–80.
- 301 38 H. M. Freese and B. Schink, *Microb. Ecol.*, 2011, **62**, 882.
- 302 39 U. Limper, B. Knopf and H. König, *J. Appl. Entomol.*, 2008, **132**, 168–176.
- 303 40 M. Desrosiers, D. Planas and A. Mucci, *Environ. Sci. Technol.*, 2006, **40**, 1540–1546.

- 304 41 T. Y. Lin, R. A. Kampalath, C.-C. Lin, M. Zhang, K. Chavarria, J. Lacson and J. A. Jay,  
305 *Environ. Sci. Technol.*, 2013, **47**, 5695–5702.
- 306 42 J. M. Harris, *Microb. Ecol.*, 1993, **25**, 195–231.
- 307 43 E. M. Sunderland, D. P. Krabbenhoft, J. W. Moreau, S. A. Strode and W. M. Landing,  
308 *Glob. Biogeochem. Cycles*, 2009, **23**, GB2010.
- 309 44 A. L. Soerensen, A. T. Schartup, A. Skrobonja and E. Björn, *Environ. Pollut. Barking*  
310 *Essex 1987*, 2017, **229**, 531–538.
- 311 45 J. T. Turner, *Aquat. Microb. Ecol.*, 2002, **27**, 57–102.
- 312 46 A. Bignert, S. Danielsson, S. Faxneld, E. Nyberg, M. Vasileiou, J. Fång, H. Dahlgren,  
313 E. Kylberg, J. Staveley Öhlund, D. Jones, M. Stenström, U. Berger, T. Alsberg, A.-S.  
314 Kärström, M. Sundbom, K. Holm, U. Eriksson, A.-L. Egebäck, P. Haglund and L. Kaj,  
315 *Comments concerning the National Swedish Contaminant Monitoring Programme in marine*  
316 *biota*, Swedish Museum of Natural History, Stockholm, Sweden, 2015, vol. 2.
- 317 47 E. Gorokhova, M. Lehtiniemi, L. Postel, G. Rubene, C. Amid, J. Lesutiene, L. Uusitalo,  
318 S. Strake and N. Demereckiene, *PloS One*, 2016, **11**, e0158326.
- 319

**Table 1.** Summary of zooplankton samples used for qPCR analysis. Samples were taken by vertical tows with a WP2 net (mesh size 90 or 100  $\mu\text{m}$ ; diameter 57 cm) equipped with a cod end. At some stations, bottom to surface tows were taken, and at others, we used either stratified tows or sampled only an upper part of the water column. Species abbreviations for copepods: *Acartia bifilosa* (Ab, adults), *Eurytemora affinis* (Ea, adults), *Limnocalanus macrurus* (Lm, CIV), and *Pseudocalanus acuspes* (Pa, CIV), and cladocerans: *Bosmina coregoni maritima* (Bm, body length > 0.7 mm) and *Cercopagis pengoi* (Cp, > 2mm, excluding the tail spine). In total, 33 field-collected zooplankton samples and 3 reference samples (*Artemia* spp.) were analyzed.

| Station | Location, area                                           | Geographic coordinates and bottom depth | Month, Year | Sampling depth, m | Number of samples per species |    |    |    |    |    |
|---------|----------------------------------------------------------|-----------------------------------------|-------------|-------------------|-------------------------------|----|----|----|----|----|
|         |                                                          |                                         |             |                   | Ab                            | Ea | Lm | Pa | Bm | Cp |
| H4      | Himmerfjärden Bay, Northern Baltic Proper, Swedish coast | N 58°59', E 17°43'; 30 m                | Jun 2007    | 28-0              |                               | 3  |    |    | 3  | 2  |
| BY31    | Landsort Deep, Northern Baltic Proper, open sea          | 58°35' N, 18°14' E; 454 m               | Jun 2009    | 100-60            |                               |    |    | 3  |    |    |
|         |                                                          |                                         |             | 30-0              | 3                             | 3  |    | 3  |    |    |
| F64     | Åland Sea, open sea                                      | N 60°11', E 19°08'; 285 m               | Sep 2009    | 100-0             | 3                             |    |    |    |    |    |
| US5b    | Bothnian Sea, open sea                                   | N 62°35', E 19°58'; 214 m               | Aug 2006    | 100-0             | 3                             |    | 4  | 3  |    |    |

**Fig. 1.** Abundance of *hgcA* gene (mean  $\pm$  SD;  $n = 3$  in all cases, except *Limnocalanus macrurus*, where  $n = 4$ ) in the Baltic copepods collected in different areas, ordered south to north; see Table 1 for the number of replicates and Figure S1 for sampling site map. No positive amplification was observed in any of the cladoceran samples. The individual-specific abundance (number of *hgcA* copies per individual) is shown in the upper panels and the weight-specific abundance (number of *hgcA* copies per  $\mu\text{g}$  wet weight of zooplankton) is shown in the lower panels (A and C: *Deltaproteobacteria* and B and D: *Firmicutes*; no positive amplification was observed for *Archaea*). Observe that selection of species is unique for every station; no value implies that no samples for the particular species was available for the analysis.

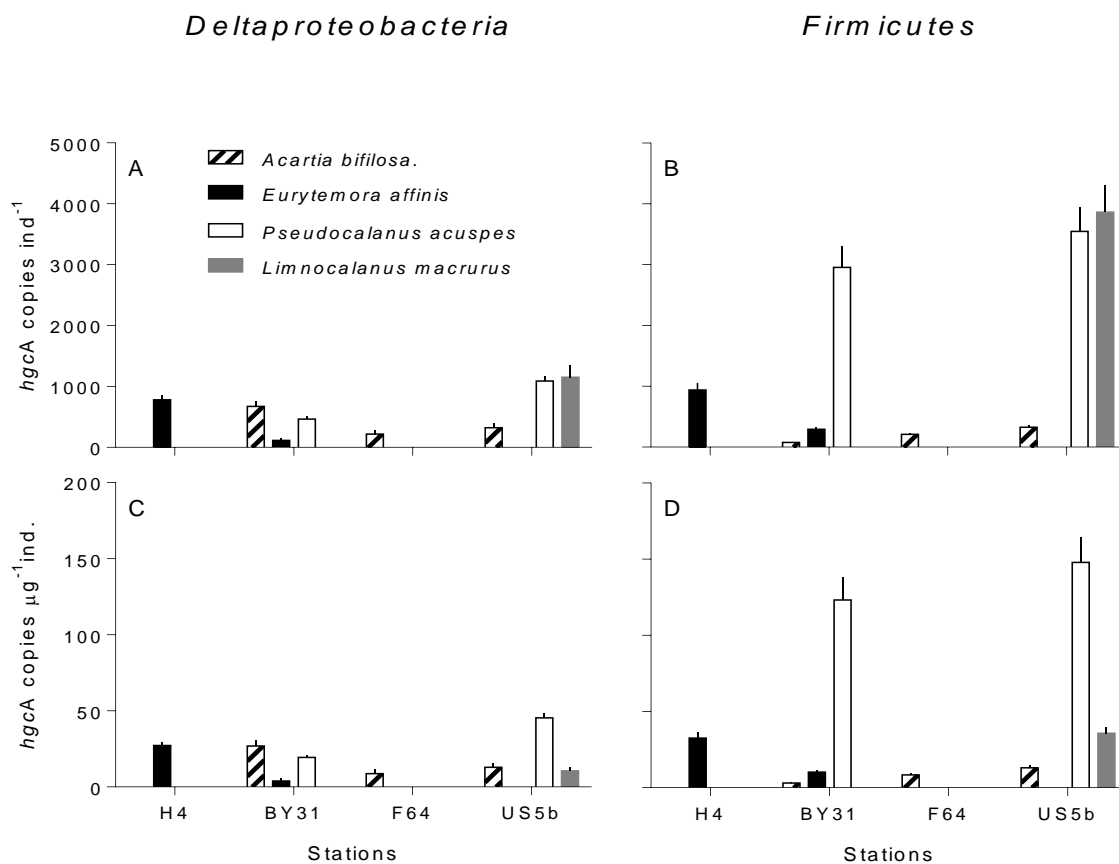

Source: https://www.biorxiv.org/content/10.1101/279976v1.full.pdf
